# Supplementary material for: Quantitative MR Analysis of Changes in the Radius Bone Marrow in Osteoporosis
Source: Hindawi journal article supplement (doi:10.1155/2023/7861495), 2023-12-27
Supplement: f1 [file 7861495.f1.zip]

| Examinee | Study Group | PINP | CTX | E2  | LH  | FSH | BMD HIP | T-score HIP | BMD FN | T-score FN | BMD LS | T-score SPINE | T-Score Group | T2     | T1w  | T1f | T1 FF | Fat % Dixon | Alcohol use | Family History      | Hormonal Pathologies | Malignancy | Sedentary lifestyle | Calcium | Physical exercise | Smoking | BMI   | Height | Weight | Age |    |
|----------|-------------|------|-----|-----|-----|-----|---------|-------------|--------|------------|--------|---------------|---------------|--------|------|-----|-------|-------------|-------------|---------------------|----------------------|------------|---------------------|---------|-------------------|---------|-------|--------|--------|-----|----|
| 1        | 2           | 69   | 582 | 30  | 25  | 65  | 0.91    | -0.8        | 0.89   | -0.8       | 1.45   | 2.1           | 2             | 119.08 | 1237 | 352 | 0.90  |             | 1           | 1                   | 0                    | 0          | 0                   | 1       | 1                 | 0       | 24.30 | 1.72   | 72     | 64  |    |
| 2        | 3           | 70   | 467 | <20 | 49  | 95  | 0.85    | -1.2        | 0.85   | -1.1       | 0.88   | -2.5          | 3             | 113.35 | 1115 | 350 | 0.88  | 92.67       | 0           | 1                   | 0                    | 0          | 1                   | 1       | 0                 | 0       | 25.70 | 1.58   | 61     | 59  |    |
| 3        | 1           | 49   | 350 |     | 6.4 | 4.8 | 0.99    | 0           | 0.94   | -0.5       | 1.19   | -0.1          | 1             | 120.77 | 1228 | 370 | 0.90  | 90.83       | 0           | 0                   | 0                    | 0          | 1                   | 1       | 1                 | 0       | 26.15 | 1.76   | 81     | 49  |    |
| 4        | 1           | 36   | 150 | 130 | 2.6 | 7.2 | 1.02    | 0.2         | 1.06   | 0.6        | 1.13   | -0.6          | 1             | 115.72 | 1250 | 350 | 0.90  | 91.32       |             |                     |                      |            |                     |         | 0                 | 18.03   | 1.58  | 45     | 50     |     |    |
| 5        | 1           |      |     | 34  | 3   | 18  | 1.03    | 0.3         | 1.04   | 0.8        | 1.18   | -0.1          | 1             | 117.60 | 1078 | 350 | 0.84  | 90.62       |             |                     |                      |            |                     |         | 0                 | 22.58   | 1.63  | 60     | 50     |     |    |
| 6        | 2           |      |     |     |     |     | 1.03    | 0.3         | 0.94   | -0.3       | 1.32   | 1             | 1             | 118.57 | 1195 | 376 | 0.90  | 90.44       | 0           | 0                   | 1                    | 0          | 0                   | 1       | 1                 | 0       | 25.80 | 1.46   | 55     | 52  |    |
| 7        | 3           | 47   | 168 | <20 | 33  | 67  | 0.66    | -2.8        | 0.66   | -2.7       | 0.83   | -2.9          | 3             | 113.31 | 1221 | 354 | 0.88  | 94.27       | 0           | 0                   | 0                    | 0          | 1                   | 1       | 1                 | 0       | 25.22 | 1.63   | 67     | 67  |    |
| 8        | 3           | 57   | 477 |     |     |     | 0.67    | -2.7        | 0.66   | -2.7       | 1.00   | -1.6          | 3             | 119.67 | 1172 | 362 | 0.95  | 92.96       | 0           | 1                   | 0                    | 0          | 0                   | 0       | 0                 | 0       | 21.91 | 1.57   | 54     | 62  |    |
| 9        | 2           | 48   | 450 | 22  | 34  | 125 | 1.2     | 1.7         | 1.03   | 0.4        | 1.31   | 0.9           | 0             |        | 1208 | 356 | 0.89  | 89.77       | 0           | 1                   | 0                    | 0          | 1                   | 0       | 0                 | 0       | 27.43 | 1.62   | 72     | 53  |    |
| 10       | 3           | 57   | 477 | 88  | 36  | 60  | 0.8     | -1.7        | 0.84   | -1.2       | 0.90   | -2.5          | 3             | 119.24 | 1073 | 350 | 0.87  | 92.87       | 0           | 0                   | 0                    | 0          | 1                   | 1       | 0                 | 1       | 22.98 | 1.77   | 72     | 48  |    |
| 11       | 2           | 66   | 554 | <20 | 24  | 67  | 1.01    | 0.1         | 0.99   | 0.1        | 1.37   | 1.4           | 0             | 115.31 | 1250 | 352 | 0.84  | 88.66       | 0           | 0                   | 0                    | 0          | 0                   | 1       | 0                 | 0       | 28.13 | 1.6    | 72     | 61  |    |
| 12       | 2           |      |     | 142 | 38  | 68  | 1.14    | 1.1         | 1.03   | 0.4        | 1.25   | 0.4           | 0             | 117.11 | 1235 | 350 | 0.89  |             | 1           | 1                   | 0                    | 0          | 0                   | 1       | 0                 | 0       | 18.29 | 1.62   | 48     | 47  |    |
| 13       | 2           |      |     |     | 27  | 67  | 0.85    | -1.2        | 0.85   | -1.1       | 1.10   | -0.5          | 2             | 110.76 | 1233 | 354 | 0.87  |             | 0           | Mother - Osteopenia | 0                    | 0          | 0                   | 0       | 0                 | 0       | 1     | 24.39  | 1.46   | 52  | 52 |
| 14       | 3           | 59   | 540 | 33  | 60  | 160 | 0.94    | -0.5        | 0.84   | -1.2       | 0.88   | -2.7          | 3             | 120.52 | 1050 | 378 | 0.93  | 90.81       |             |                     |                      |            |                     |         | 1                 | 27.39   | 1.48  | 60     | 61     |     |    |
| 15       | 1           | 28   | 252 | 50  | 25  | 33  | 1.17    | 1.4         | 0.98   | 0          | 1.08   | -0.9          | 2             | 122.63 | 1235 | 364 | 0.89  | 89.20       | 0           | 0                   | 0                    | 0          | 0                   | 1       | 1                 | 0       | 25.78 | 1.6    | 66     | 54  |    |
| 16       | 3           | 40   | 420 | 31  | 30  | 51  | 0.81    | -1.6        | 0.77   | -1.8       | 0.75   | -3.6          | 3             | 116.88 | 1250 | 376 | 0.90  | 91.97       | 0           | 0                   | 0                    | 0          | 0                   | 0       | 0                 | 0       | 29.67 | 1.59   | 75     | 65  |    |
| 17       | 3           | 51   | 410 | <20 | 11  | 60  | 0.67    | -2.8        | 0.64   | -2.9       | 0.81   | -3.1          | 3             | 117.20 | 1220 | 382 | 0.91  | 90.14       | 0           | 0                   | 0                    | 0          | 0                   | 1       | 1                 | 0       | 23.27 | 1.565  | 57     | 66  |    |
| 19       | 2           | 52   | 357 | 32  | 20  | 64  | 0.98    | -0.1        | 0.88   | -0.8       | 1.11   | -0.7          | 2             | 117.94 | 1250 | 374 | 0.89  | 93.99       |             |                     |                      |            |                     |         |                   |         |       |        |        | 62  |    |
| 20       | 2           | 38   | 421 | 137 | 30  | 36  | 1.19    | 1.5         | 1.10   | 1          | 1.25   | 0.4           | 0             | 119.16 | 1051 | 370 | 0.92  | 90.59       | 0           | 0                   | 0                    | 0          | 0                   | 0       | 0                 | 0       | 25.91 | 1.69   | 74     | 54  |    |
| 21       | 3           | 58   | 430 | <20 | 21  | 74  | 0.8     | -1.7        | 0.82   | -1.3       | 0.87   | -2.6          | 3             |        |      |     |       | 90.24       | 0           | 0                   | 0                    | 0          | 0                   | 0       | 0                 | 0       | 24.14 | 1.55   | 58     | 63  |    |
| 22       | 2           |      |     | <20 | 18  | 40  | 0.97    | -0.3        | 0.94   | -0.3       | 1.25   | 0.4           | 1             | 119.24 | 1181 | 356 | 0.85  | 89.43       | 0           | 1                   | 0                    | 0          | 0                   | 1       | 0                 | 1       | 27.12 | 1.685  | 77     | 52  |    |
| 23       | 2           |      |     |     |     |     | 0.97    | -0.2        | 0.99   | 0.1        | 0.99   | -1.5          | 2             | 113.23 | 1050 | 362 | 0.91  | 89.72       | 1           | 0                   | 0                    | 0          | 1                   | 0       | 0                 | 1       | 21.45 | 1.7    | 62     | 48  |    |
| 26       | 1           | 34   | 201 | 63  | 8.6 | 14  | 1.1     | 0.8         | 1.03   | 0.4        | 1.46   | 2.1           | 0             | 119.36 | 1250 | 368 | 0.87  | 89.39       | 0           | 0                   | 0                    | 0          | 1                   | 1       | 0                 | 0       | 25.50 | 1.76   | 79     | 43  |    |
| 28       | 3           |      |     |     |     |     | 0.64    | -3          | 0.65   | -2.8       | 0.99   | -1.6          | 3             | 116.37 | 1217 | 354 | 0.89  | 91.95       |             |                     |                      |            |                     |         | 1                 | 21.41   | 1.66  | 59     | 61     |     |    |
| 29       | 1           |      |     |     |     |     | 1.02    | 0.2         | 0.94   | -0.3       | 1.16   | -0.3          | 1             | 120.60 | 1173 | 350 | 0.90  | 90.59       | 0           | 0                   | 0                    | 0          | 0                   | 0       | 1                 | 0       | 20.83 | 1.58   | 52     | 46  |    |
| 30       | 1           | 30   | 216 | <20 | 6   | 16  | 1.04    | 0.3         | 0.96   | 0          | 1.34   | 1.2           | 0             | 118.75 | 1248 | 366 | 0.87  | 91.10       | 0           | 0                   | 0                    | 0          | 1                   | 1       | 0                 | 0       | 26.67 | 1.62   | 70     | 48  |    |
